# Supplementary material for: Engineered endothelium provides angiogenic and paracrine stimulus to grafted human ovarian tissue
Source: PubMed Central journal article supplement (PMC5557862; doi:10.1038/s41598-017-08491-z), 2017-08-15

## **Supplementary Material**

### **Engineered endothelium provides angiogenic and paracrine stimulus to grafted human ovarian tissue**

Limor Man<sup>1</sup>, Laura Park<sup>1</sup>, Richard Bodine<sup>1</sup>, Michael Ginsberg<sup>2</sup>, Nikica Zaninovic<sup>1,3</sup>,  
Omar Alexander Man<sup>1</sup>, Glenn Schattman<sup>1</sup>, Zev Rosenwaks<sup>1,3</sup> and Daylon James<sup>1,3 \*</sup>

<sup>1</sup> Center for Reproductive Medicine and Infertility, Weill Cornell Medical College, New York, NY, 10065.

<sup>2</sup> Angiocrine Biosciences, Inc., 1300 York Avenue, New York, NY, 10028

<sup>3</sup> Tri-Institutional Stem Cell Derivation Laboratory, Weill Cornell Medical College, New York, NY, 10065

**Supplementary Figure 1.** a) Following thaw of cryopreserved ovarian cortical strips, cytochrome P450 labeled follicles (red) are present in abundance. Insets are enlarged in the associated box. Scale bars = 100  $\mu$ m. b) Xenograft of human ovarian tissue co-transplanted with ExECs (green) and intra-vitally administered GIB4 lectin (red). c) Representative sections of ovarian grafts co-transplanted with ExECs, without cells and with human foreskin fibroblasts. Insets are enlarged in the associated box. d) Median density  $\pm$ MAD of total follicles per squared millimeter in smaller (3-6  $\text{mm}^2$ , n=7) or larger (8-18 $\text{mm}^2$ , n=8) ovarian grafts with and without ExECs.

**Supplementary Video 1. Mouse #1 MRI showing coronal sections at 14 and 15 weeks.**

**Supplementary Video 2. Mouse #1 MRI showing sagittal sections at 14 and 15 weeks.**

**Supplementary Video 3. Mouse #3 MRI showing coronal sections at 20, 21 and 22 weeks.**



# Supplementary Figure 1

## a Cytochrome P450 (Follicles) Nuclei

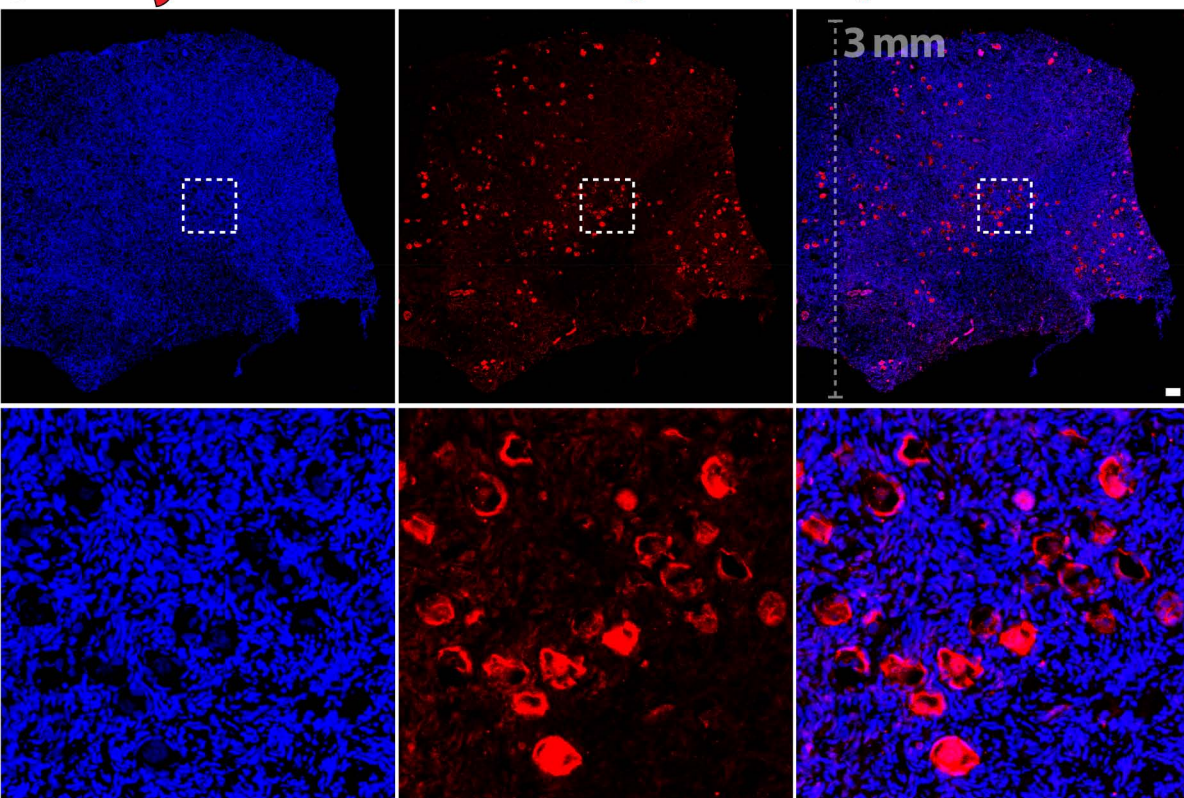

## b Lectin MsEC Nuclei

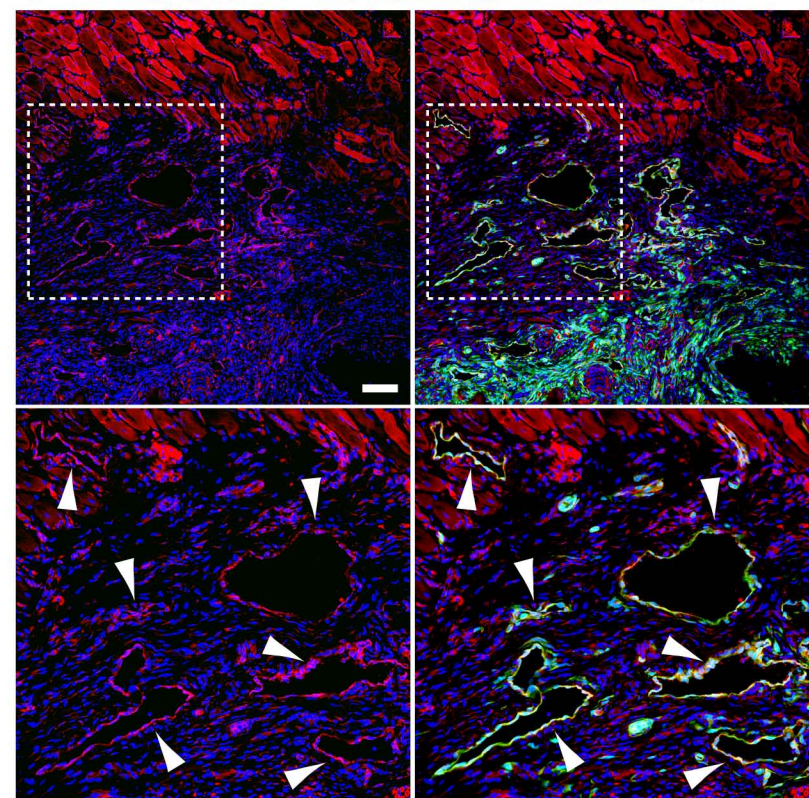

## c ECs no ECs Fibroblasts

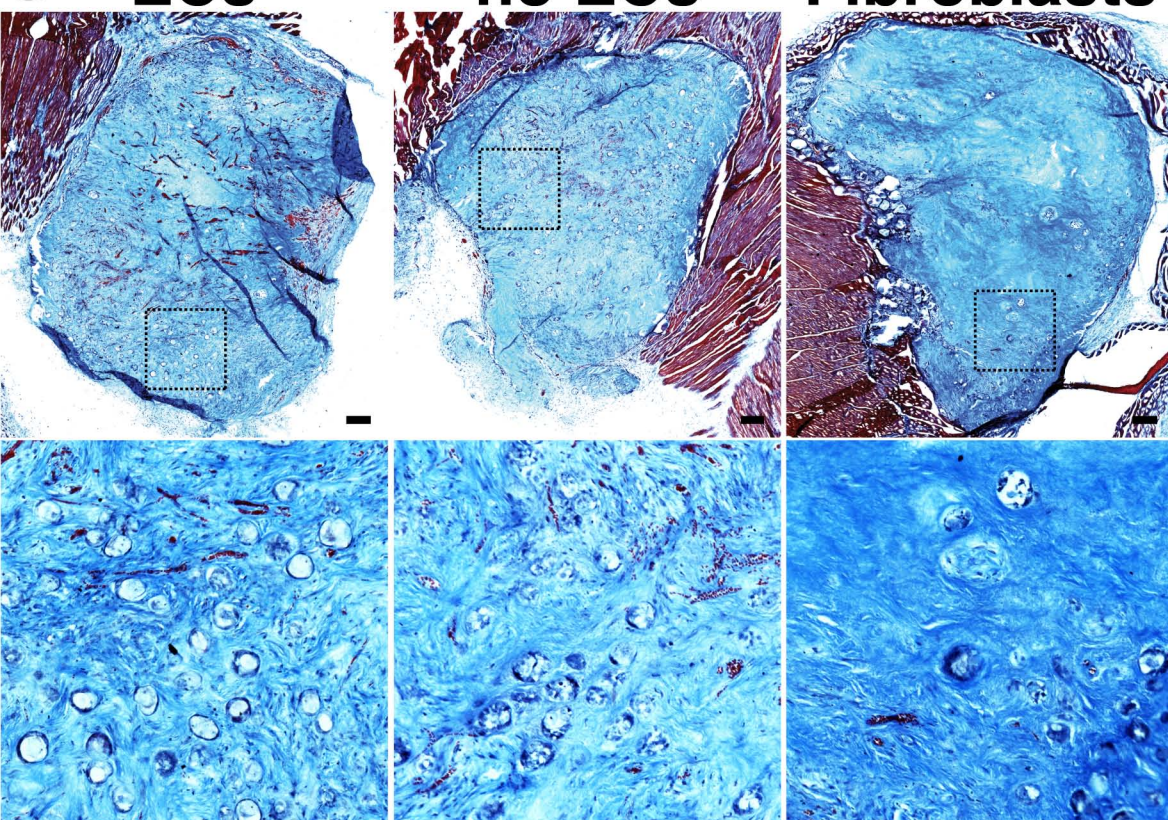

## d

□ - no ECs ■ - ECs

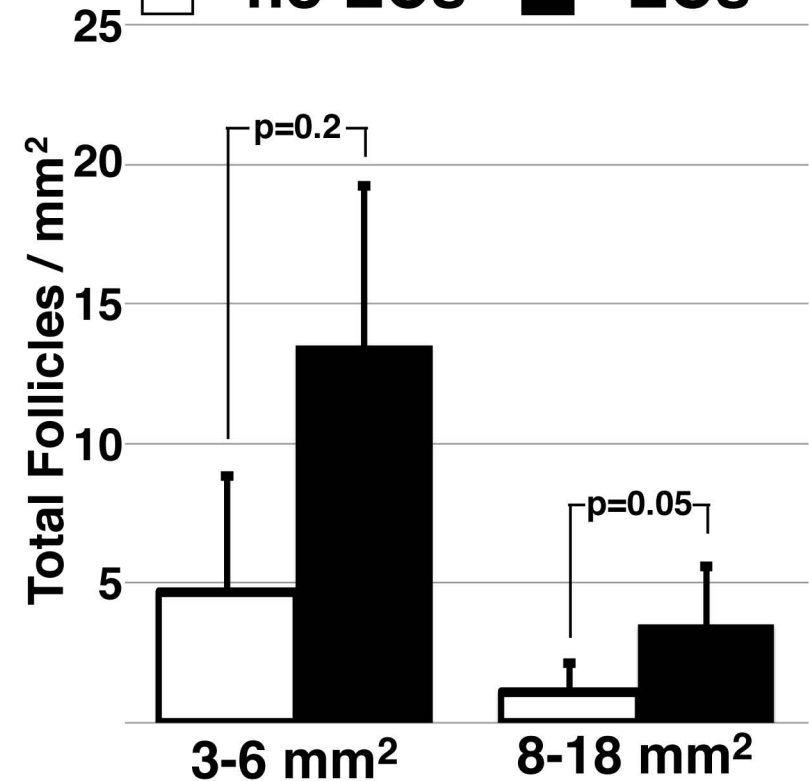

Supplement: 41598_2017_8491_MOESM1_ESM.pdf [file 41598_2017_8491_MOESM1_ESM.pdf]
